# Supplementary material
Source: ML conference proceedings conference paper supplement (https://openaccess.thecvf.com/content/WACV2023/html/Belharbi_TCAM_Temporal_Class_WACV_2023_paper.html)
Supplement: Supplementary file 1 [file Belharbi_TCAM_Temporal_Class_WACV_2023_supplemental.pdf]

# Supplementary Material for: TCAM: Temporal Class Activation Maps for Object Localization in Weakly-Labeled Unconstrained Videos

Soufiane Belharbi<sup>1</sup>, Ismail Ben Ayed<sup>1</sup>, Luke McCaffrey<sup>2</sup>, and Eric Granger<sup>1</sup>

<sup>1</sup> LIVIA, Dept. of Systems Engineering, École de technologie supérieure, Montreal, Canada

<sup>2</sup> Goodman Cancer Research Centre, Dept. of Oncology, McGill University, Montreal, Canada

soufiane.belharbi.1@ens.etsmtl.ca, {ismail.benayed, eric.granger}@etsmtl.ca,  
luke.mccaffrey@mcgill.ca

## 1. CRF loss

Given an input image  $\mathbf{X}_t$  and the softmax activation  $\mathbf{S}_t$  of the decoder, the CRF loss is formulated [10] as,

$$\mathcal{R}(\mathbf{S}_t, \mathbf{X}_t) = \sum_{r=0}^{r=1} \mathbf{S}_t^r \top \mathbf{W} (\mathbf{1} - \mathbf{S}_t^r), \quad (1)$$

where  $\mathbf{W}$  is an affinity matrix where  $\mathbf{W}[i, j]$  captures the color similarity and proximity between pixels  $i, j$  in the image  $\mathbf{X}_t$ . We consider using Gaussian kernel to capture color and spatial similarities [6]. We use the permutohedral lattice [1] for fast computation of  $\mathbf{W}$ . Minimizing Eq.1 pushes the decoder to produce consistent activations for nearby pixels with similar color.

## 2. Classification performance

Although it is not commonly provided, we present classification performance in Tab.1 for our trained CAM-methods since they are able to do both tasks: classification, and localization. These methods yielded descent classification performance. However, there is a large margin between both datasets showing the difficulty of YTOv2.2 dataset.

## 3. Visual results and demonstrative videos

Fig.1, 2 present more prediction cases over labeled ground truth frames. More illustrative videos can be downloaded from this google-drive link: <https://drive.google.com/drive/folders/1SjPed6h3XaxmwrWuYv-h9dhNhwESRH9P?usp=sharing>.

| Methods                                   | YTOv1       | YTOv2.2     |
|-------------------------------------------|-------------|-------------|
| CAM [11] ( <i>cvpr,2016</i> )             | 85.3        | 73.9        |
| GradCAM [9] ( <i>iccv,2017</i> )          | 85.3        | 71.3        |
| GradCAM++ [2] ( <i>wacv,2018</i> )        | 84.4        | 72.4        |
| Smooth-GradCAM++ [7] ( <i>corr,2019</i> ) | 82.6        | <b>75.2</b> |
| XGradCAM [3] ( <i>bmvc,2020</i> )         | <b>87.3</b> | 71.6        |
| LayerCAM [4] ( <i>ieee,2021</i> )         | 84.4        | 72.1        |
| TCAM (ours)                               | 84.4        | 72.1        |

Table 1: Classification accuracy (CL) on test set of YTOv1 [8] and YTOv2.2 [5] datasets.

## 4. Our code

We provide our implementation code using Pytorch<sup>1</sup> framework<sup>2</sup>.

## Acknowledgment

This research was supported in part by the Canadian Institutes of Health Research, the Natural Sciences and Engineering Research Council of Canada, and the Digital Research Alliance of Canada ([alliancecan.ca](http://alliancecan.ca)).

## References

- [1] A. Adams, J. Baek, and M. A. Davis. Fast high-dimensional filtering using the permutohedral lattice. *Comput. Graph. Forum*, 29(2):753–762, 2010.
- [2] A. Chattopadhyay, A. Sarkar, P. Howlader, and V. N. Balasubramanian. Grad-cam++: Generalized gradient-based visual explanations for deep convolutional networks. In *WACV*, 2018.
- [3] Ruigang Fu, Qingyong Hu, Xiaohu Dong, Yulan Guo, Yinghui Gao, and Biao Li. Axiom-based grad-cam: Towards accurate visualization and explanation of cnns. In *BMVC*, 2020.

<sup>1</sup><https://pytorch.org>

<sup>2</sup>Code: <https://github.com/sbelharbi/tcam-wsol-video>.

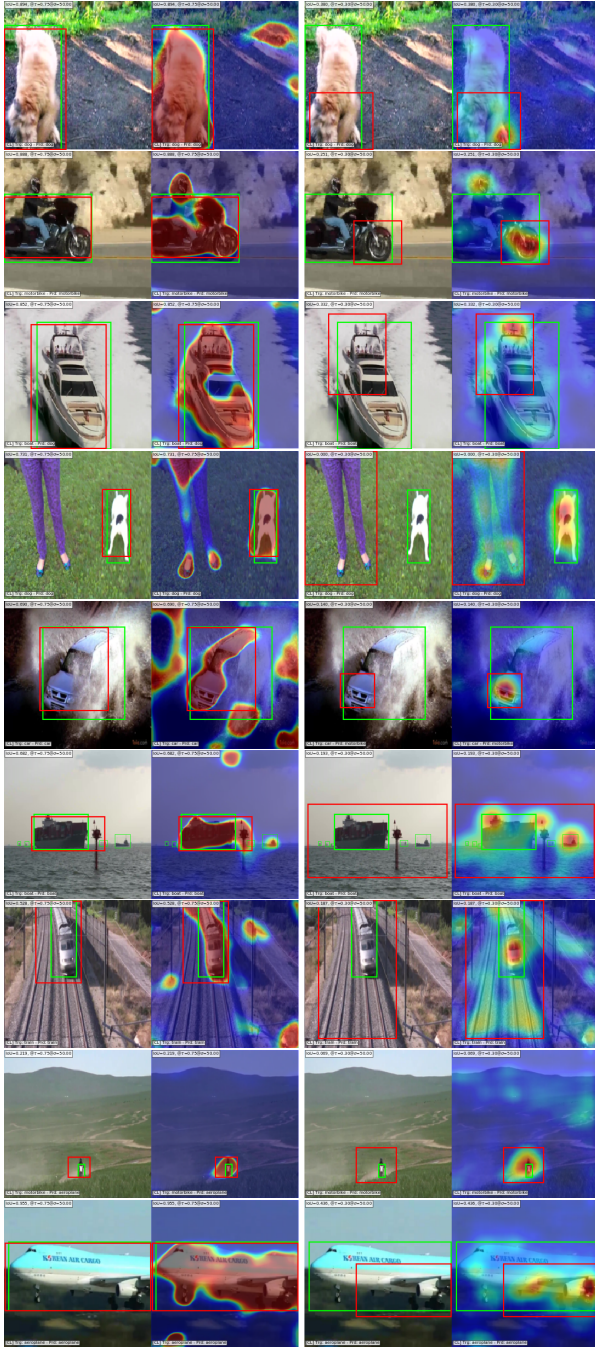

Figure 1: Prediction examples of test sets frames. *Left*: TCAM (ours). *Right*: baseline CAM method, LayerCAM [4]. *Bounding box*: ground truth (green), prediction (red). Second column is predicted CAM over image.

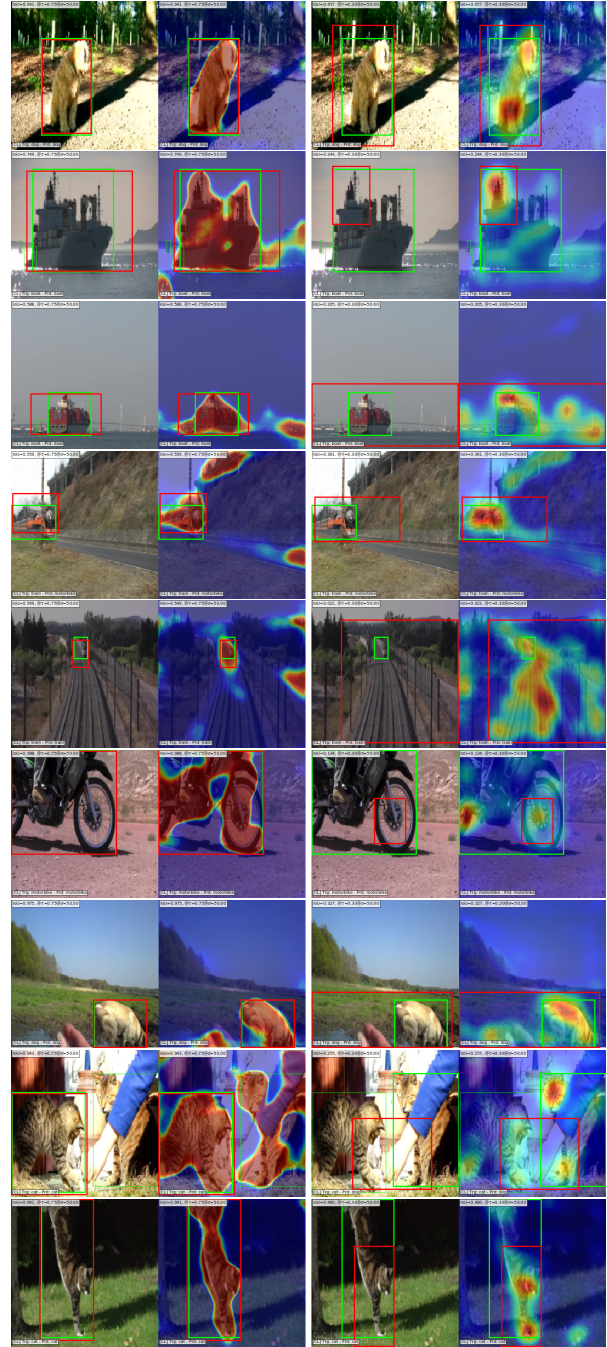

Figure 2: Prediction examples of test sets frames. *Left*: TCAM (ours). *Right*: baseline CAM method, LayerCAM [4]. *Bounding box*: ground truth (green), prediction (red). Second column is predicted CAM over image.

- [4] P.-T. Jiang, C.-B. Zhang, Q. Hou, M.-M. Cheng, and Y. Wei. Layercam: Exploring hierarchical class activation maps for localization. *IEEE Trans. Image Process.*, 30:5875–5888, 2021.
- [5] Vi Kalogeiton, V. Ferrari, and C. Schmid. Analysing domain shift factors between videos and images for object detection. *TPAMI*, 38(11):2327–2334, 2016.

- [6] Philipp Krähenbühl and Vladlen Koltun. Efficient inference in fully connected crfs with gaussian edge potentials. In J.S.-Taylor, R.S. Zemel, P.L. Bartlett, F.C. N. Pereira, and K.Q. Weinberger, editors, *NeurIPS*, 2011.
- [7] D. Omeiza, S. Speakman, C. Cintas, and K. Weldemariam. Smooth grad-cam++: An enhanced inference level visualization technique for

deep convolutional neural network models. *CoRR*, abs/1908.01224, 2019.

- [8] A. Prest, C. Leistner, J. Civera, C. Schmid, and V. Ferrari. Learning object class detectors from weakly annotated video. In *CVPR*, 2012.
- [9] R. R. Selvaraju, M. Cogswell, A. Das, R. Vedantam, D. Parikh, and D. Batra. Grad-cam: Visual explanations from deep networks via gradient-based localization. In *ICCV*, 2017.
- [10] M. Tang, F. Perazzi, A. Djelouah, I. Ben Ayed, C. Schroers, and Y. Boykov. On regularized losses for weakly-supervised cnn segmentation. In *ECCV*, 2018.
- [11] B. Zhou, A. Khosla, A. Lapedriza, A. Oliva, and A. Torralba. Learning deep features for discriminative localization. In *CVPR*, 2016.
